# Supplementary material for: Antibiotic Use and Resistance Knowledge Assessment of Personnel on Chicken Farms with High Levels of Antimicrobial Resistance: A Cross-Sectional Survey in Ica, Peru
Source: MDPI journal article supplement (doi:10.3390/antibiotics11020190), 2022-02-01
Supplement: s1 [file s1]

ANTIBIOTICS RESISTANCE QUESTIONNAIRE (date ...../...../.....)

**AGE (years):**

**GENDER:**

☐ Female

☐ Male

**EDUCATION (year of study):**

☐ Early childhood education

☐ Primary

☐ Secondary

**1) When did you last take antibiotics?**

☐ In the last month

☐ In the last 6 months

☐ In the last year

☐ More than a year ago

☐ Never

☐ I can't remember

*If "Never" have chosen, go directly to question 4*

**2) On that occasion, did you get the antibiotics (or a prescription for them) from a doctor or nurse?**

☐ Yes

☐ No

☐ I can't remember

**3) On that occasion, where did you get the antibiotics?**

☐ Medical store or pharmacy

☐ Stall or hawker

☐ The internet

☐ Friend or family member

☐ I had them saved up from a previous time

☐ Somewhere/someone else

☐ Can't remember

**4) When do you think you should stop taking antibiotics once you have begun treatment?**

☐ When I feel better

☐ When I have taken all of the antibiotics as directed

☐ I don't know

**5) Do you think this statement is 'true' or 'false'? "It's okay to use antibiotics that were given to a friend or family member, as long as they were used to treat the same illness"**

☐ True

☐ False

☐ Don't know

**6) Do you think this statement is 'true' or 'false'? "It's okay to buy the same antibiotics, or request these from a doctor, if you're sick and they helped you get better when you had the same symptoms before"**

- ☐ True
- ☐ False
- ☐ Don't know

**7) Do you think these conditions can be treated with antibiotics?**

- ☐ HIV/AIDS
- ☐ Gonorrhoea
- ☐ Bladder infection or urinary tract infection (UTI)
- ☐ Diarrhoea
- ☐ Cold and flu
- ☐ Fever
- ☐ Malaria
- ☐ Measles
- ☐ Skin or wound infection
- ☐ Sore throat
- ☐ Body aches
- ☐ Headaches

**8) Have you heard of any of the following terms**

- ☐ Antibiotic resistance
- ☐ Superbugs
- ☐ Antimicrobial resistance
- ☐ AMR
- ☐ Drug resistance
- ☐ Antibiotic-resistant bacteria

9) On the scale shown, how much do you agree the following actions would help address the problem of antibiotic resistance?

|   |                                                                                  | True | False |
|---|----------------------------------------------------------------------------------|------|-------|
| 1 | People should use antibiotics only when they are prescribed by a doctor or nurse |      |       |
| 2 | Farmers should give fewer antibiotics to food-producing animals                  |      |       |
| 3 | People should not keep antibiotics and use them later for other illnesses        |      |       |
| 4 | Parents should make sure all of their children's vaccinations are up-to-date     |      |       |
| 5 | People should wash their hands regularly                                         |      |       |
| 6 | Doctors should only prescribe antibiotics when they are needed                   |      |       |
| 7 | Governments should reward the development of new antibiotics                     |      |       |
| 8 | Pharmaceutical companies should develop new antibiotics                          |      |       |
