# Supplementary material for: Antibiotic Use and Resistance Knowledge Assessment of Personnel on Chicken Farms with High Levels of Antimicrobial Resistance: A Cross-Sectional Survey in Ica, Peru
Source: MDPI journal article supplement (doi:10.3390/antibiotics11020190), 2022-02-01
Supplement: s1 [file s1]

**CUESTIONARIO SOBRE RESISTENCIA ANTIBIÓTICA (fecha ...../...../.....)**

**EDAD (años):**

**GÉNERO:**

☐ Femenino

☐ Masculino

**EDUCACIÓN (nivel de estudios):**

☐ Inicial

☐ Primaria

☐ Secundaria

**1) ¿Cuándo tomó antibióticos por última vez?**

☐ En el último mes

☐ En los últimos 6 meses

☐ En el último año

☐ Hace más de un año

☐ Nunca

☐ No recuerda

*Si eligió "Nunca", ir directamente a la pregunta 5*

**2) En esa ocasión, ¿obtuvo los antibióticos de un doctor o enfermero (a)?**

☐ Sí

☐ No

☐ No recuerda

**3) En esa ocasión, ¿de dónde obtuvo los antibióticos?**

☐ Botica o farmacia

☐ Puesto o vendedor ambulante

☐ Internet

☐ Amigo o familiar

☐ Los tenía guardados de una vez anterior

☐ Otro lugar/ alguien más

☐ No recuerda

**4) ¿Cuándo considera que debe dejar de tomar antibióticos una vez iniciado el tratamiento?**

☐ Cuando me sienta mejor

☐ Cuando haya tomado todos los antibióticos según lo indicado

☐ No sabe

**5) ¿Considera la siguiente afirmación ser ‘verdadera’ o ‘falsa’? “Está bien usar antibióticos que fueron provistos por un amigo o familiar, siempre y cuando fueron usados para tratar la misma enfermedad”**

☐ Verdadero

☐ Falso

☐ No sabe

**6) ¿Considera la siguiente afirmación ser ‘verdadera’ o ‘falsa’? “Está bien comprar los mismos antibióticos, o solicitarlos a un doctor, si está enfermo y anteriormente ayudaron a hacerlo sentir mejor cuando tuvo los mismos síntomas”**

- ☐ Verdadero
- ☐ Falso
- ☐ No sabe

**7) ¿Cuáles de estas condiciones considera pueden ser tratadas con antibióticos?**

- ☐ VIH/SIDA
- ☐ Gonorrea
- ☐ Infección de las vías urinarias (ITU) o cistitis
- ☐ Diarrea
- ☐ Resfrío o gripe
- ☐ Fiebre
- ☐ Malaria
- ☐ Sarampión
- ☐ Infección de piel o herida
- ☐ Dolor de garganta
- ☐ Dolor de cuerpo
- ☐ Dolor de cabeza

**8) ¿Cuáles de los siguientes términos ha escuchado?**

- ☐ Resistencia antibiótica
- ☐ Superbacteria
- ☐ Resistencia antimicrobiana
- ☐ AMR
- ☐ Resistencia a las drogas
- ☐ Bacteria resistente a antibióticos

**10) En la escala, ¿cuánto está de acuerdo con las siguientes acciones que ayudarían a abordar el problema de la resistencia a los antibióticos?**

|   |                                                                                                       | Verdadero | Falso |
|---|-------------------------------------------------------------------------------------------------------|-----------|-------|
| 1 | Las personas deberían usar antibióticos solo cuando reciban una prescripción de un doctor o enfermera |           |       |
| 2 | Los granjeros deberían dar menos antibióticos a los animales de producción                            |           |       |
| 3 | Las personas no deberían guardar antibióticos y usarlos posteriormente para otras enfermedades        |           |       |
| 4 | Los padres deberían asegurarse que sus hijos tengan todas sus vacunas al día                          |           |       |
| 5 | Las personas deberían lavarse las manos regularmente                                                  |           |       |
| 6 | Los doctores solo deberían prescribir antibióticos cuando es necesario                                |           |       |
| 7 | Los gobiernos deberían recompensar el desarrollo de nuevos antibióticos                               |           |       |
| 8 | Las compañías farmacéuticas deberían desarrollar nuevos antibióticos                                  |           |       |
